# Supplementary material for: Determination of the Electrochemical Area of Screen-Printed Electrochemical Sensing Platforms
Source: PubMed Central journal article supplement (PMC6023085; doi:10.3390/bios8020053), 2018-06-08
Supplement: biosensors-08-00053-s001.pdf [file biosensors-08-00053-s001.pdf]

# Supplementary Material: Determination of the electrochemical area of screen-printed electrochemical sensing platforms

Alejandro García-Miranda Ferrari <sup>1,2</sup>, Christopher W. Foster <sup>1,2</sup>, Peter J. Kelly <sup>1</sup>,  
Dale A. C. Brownson <sup>1,2</sup> and Craig E. Banks <sup>1,2,\*</sup>

<sup>1</sup> Faculty of Science and Engineering, Manchester Metropolitan University, Manchester M1 5GD, UK; alejandro.garcia-miranda-ferrari@stu.mmu.ac.uk (A.G.-M.F.); cwfoster90@gmail.com (C.W.F.); peter.kelly@mmu.ac.uk (P.J.K.); d.brownson@mmu.ac.uk (D.A.C.B.)

<sup>2</sup> Manchester Fuel Cell Innovation Centre, Manchester Metropolitan University, Manchester M1 5GD, UK

\* Correspondence: c.banks@mmu.ac.uk; Tel.: +(0)1-612-471-196; Fax: +(0)1-612-476-831

Received: 3 April 2018; Accepted: 6 June 2018; Published: 8 June 2018

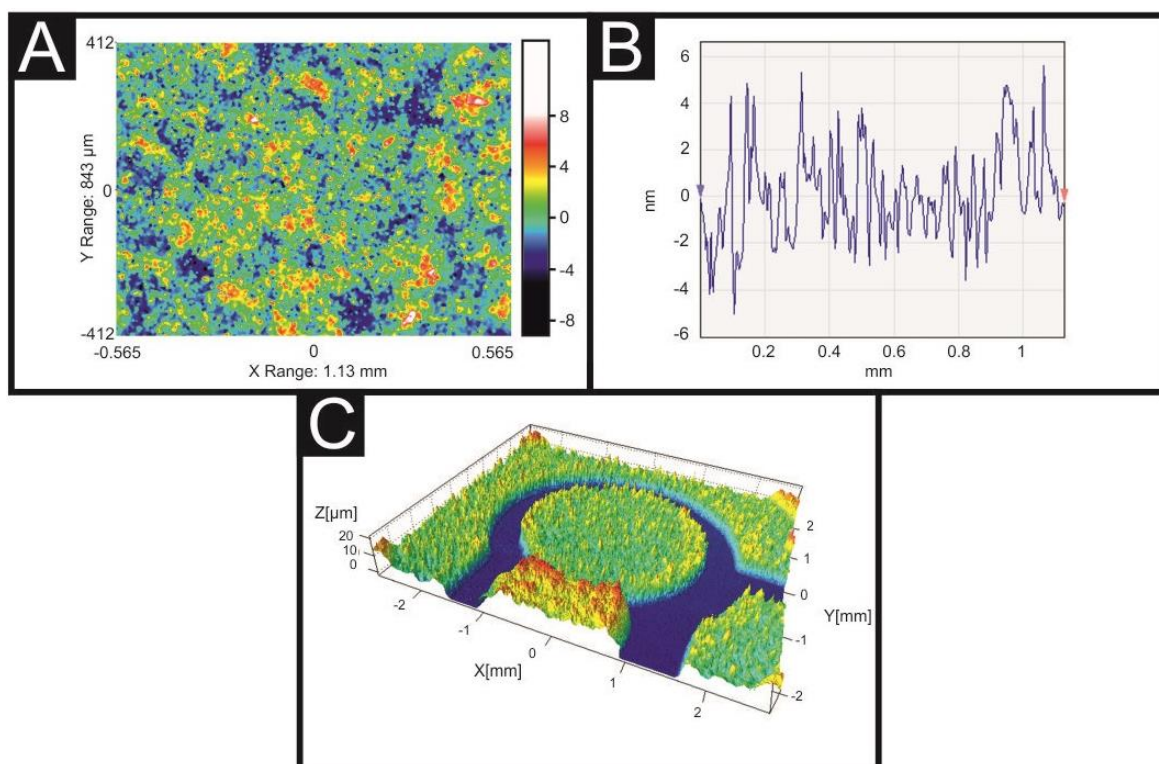

**Figure S1.** Topography measurement on a screen-printed electrode (A), height profile (B) from data shown in A and a 3D plot of the topography measurements (C).
